# Supplementary material
Source: Springer Nature journal article supplement (https://www.springermedizin.de/resource/supplementary/12916_2012_605_MOESM2_ESM.pdf/9597970)
Supplement: MOESM2 [file 9597970]

286 records  
( 7 DARE + 1 CDSR +  
202 EMBASE + 78 MEDLINE)

Duplicates N = 40

248 potential reviews

Excluded by title and abstract

- 56 non efficacy reviews
- 43 other drugs or NPT
- 31 combination therapy
- 42 concomitant diseases\*
- 12 specific populations\*\*
- 6 non-English publications

58 full-text reviews

Excluded by full-text article

- 9 specified depression†
- 4 co-morbid conditions
- 3 non English publications
- 1 overview of reviews

4 reviews from  
HTA agencies

45 selected reviews

81 potentially  
eligible reports

Excluded

- 9 specified depression
- 3 non English publication
- 3 non efficacy data
- 1 non randomized study

12 reports  
from FDA & French  
National Authority  
for Health

44 RCTs  
(65 full-text reports)

Excluded

- 20 RCTs comparing  
citalopram/escitalopram to  
other active comparators
- 1 RCT with insufficient  
outcome data

1 RCT identified  
from search  
on 2011 to 2012

23 eligible RCTs  
(38 full-text reports)
